# Supplementary material for: Wrist-Based Accelerometer Cut-Points to Identify Sedentary Time in 5–11-Year-Old Children
Source: MDPI journal article supplement (doi:10.3390/children5100137), 2018-09-26
Supplement: s1 [file s1]

Supplementary Figure 1. Distribution of counts/5second epoch for each sedentary activity versus walking

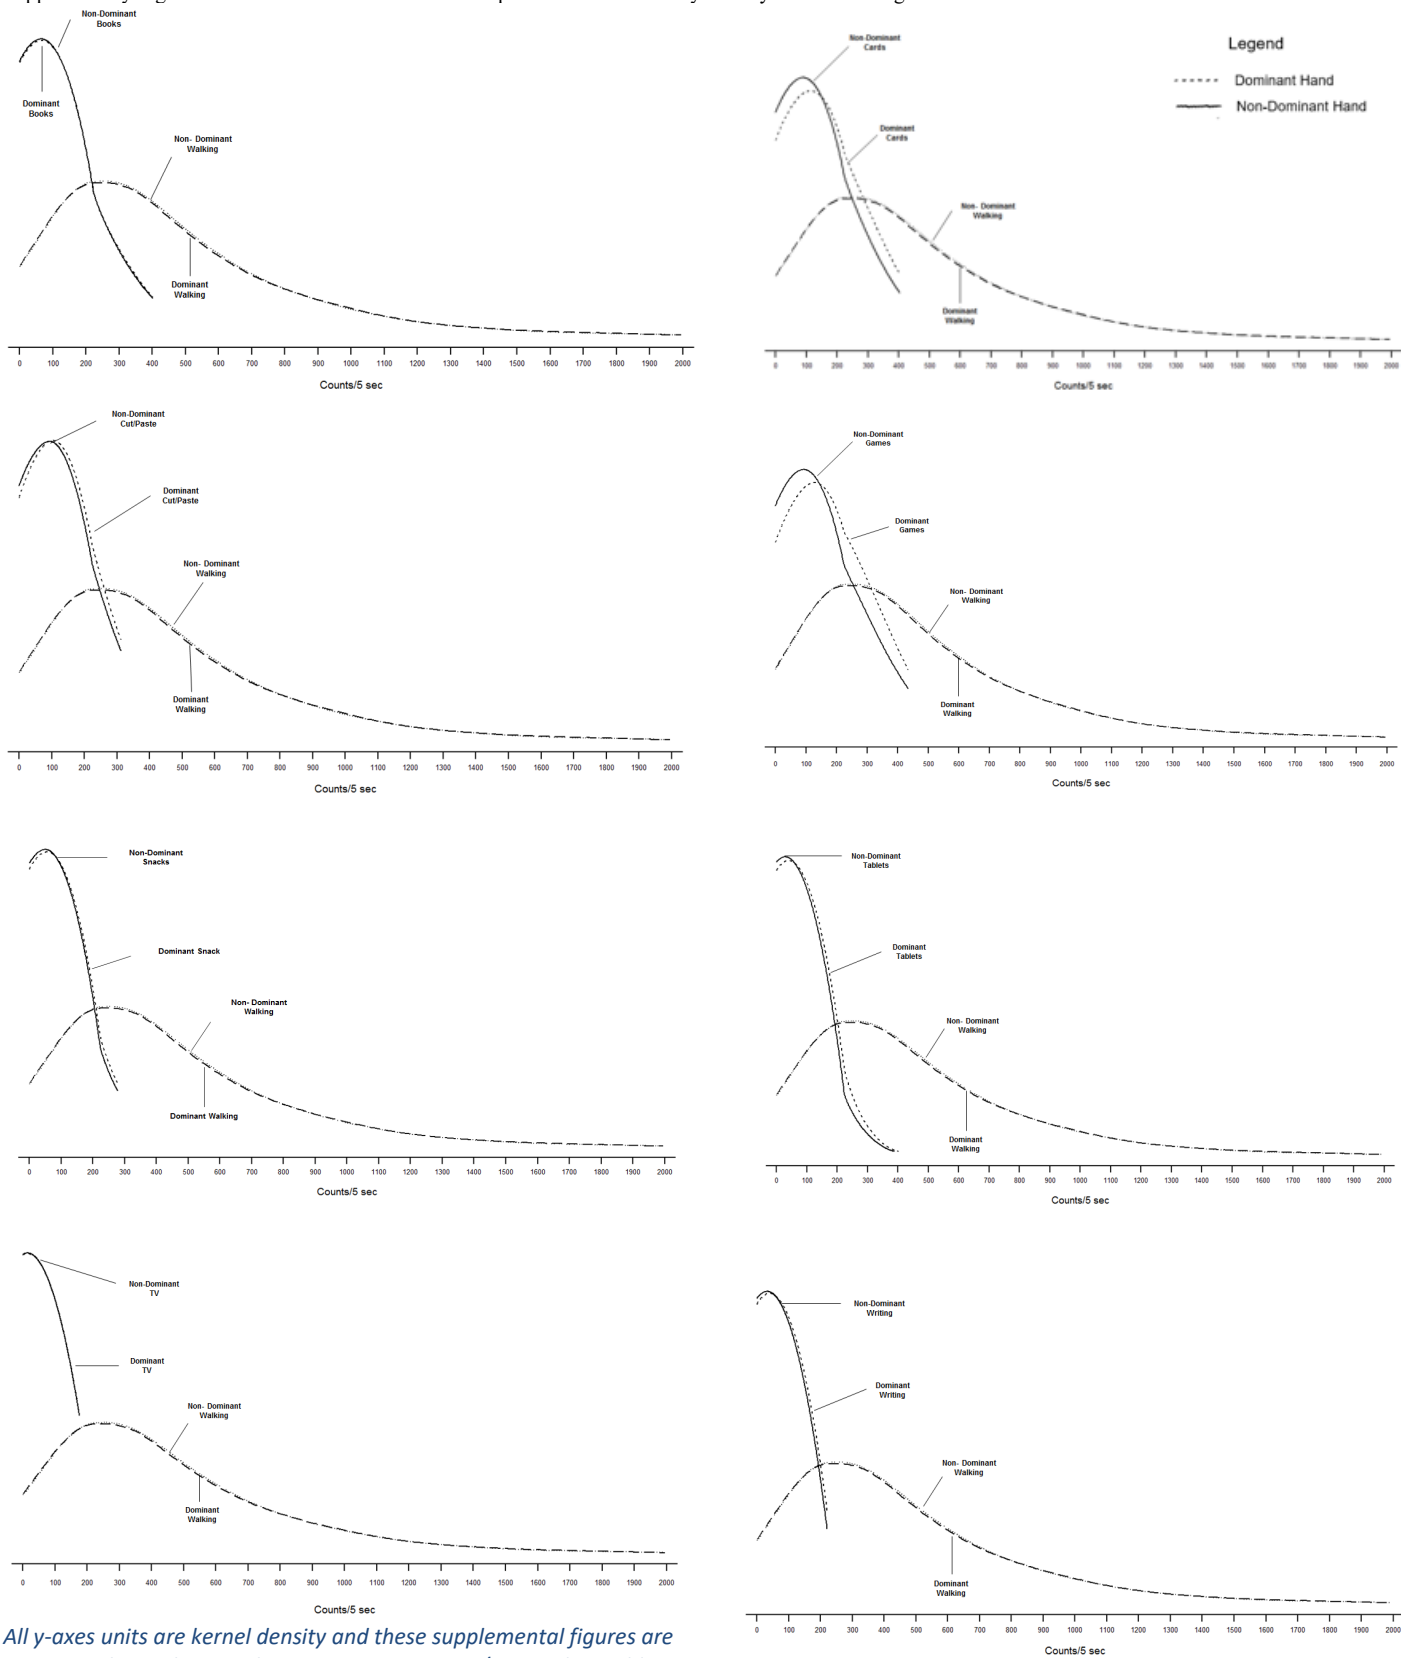

All y-axis units are kernel density and these supplemental figures are meant to show where each activities mean count/5seconds would intersect with walking, separated by wrist placement
